# Supplementary material for: Structural basis for functional interactions in dimers of SLC26 transporters
Source: PubMed Central journal article supplement (PMC6497670; doi:10.1038/s41467-019-10001-w), 2019-05-02
Supplement: 41467_2019_10001_MOESM2_ESM.pdf [file 41467_2019_10001_MOESM2_ESM.pdf]

**Structural basis for functional interactions in dimers of SLC26 transporters**  
Chang et al.

**Supplementary Data 1 - Primers used for mutagenesis**

| Name            | Sequence (5' - 3')                   |
|-----------------|--------------------------------------|
| pINIT_F         | GAGTAGGACAAATCCGC                    |
| pINIT_R         | TGGCAGTTTATGGCGGGCGT                 |
| SLC26Dg_I45C_F  | GCTTTCTCCATCTGCGCGGGCGTCGATCCGCAG    |
| SLC26Dg_I45C_R  | ATCGACGCCCGCGCAGATGGAGAAAGCGATTGC    |
| SLC26Dg_A142C_F | CTGATCTTTATGTGCCAGCTCCCCAGTTCGTA     |
| SLC26Dg_A142C_R | CTGGGGGAGCTGGCACATAAAGATCAGGATGGC    |
| SLC26Dg_V129C_F | CGCAGCGTCATGTGCGGCTTCGTGAATGCGCTG    |
| SLC26Dg_V129C_R | ATTCACGAAGCCGCACATGACGCTGCGCGGCAC    |
| SLC26Dg_L144C_F | TTTATGGCGCAGTGCCCCAGTTCGTAGGTGCG     |
| SLC26Dg_L144C_R | TACGAACTGGGGGCACTGCGCCATAAAGATCAG    |
| SLC26Dg_W152C_F | GTAGGTGCGAACTGCCAGATGTACGCCATGGTC    |
| SLC26Dg_W152C_R | GGCGTACATCTGGCAGTTCGCACCTACGAACTG    |
| SLC26Dg_M154C_F | GCGAACTGGCAGTGCTACGCCATGGTCGCCGCT    |
| SLC26Dg_M154C_R | GACCATGGCGTAGCACTGCCAGTTCGCACCTAC    |
| SLC26Dg_I164C_F | GCTGGTCTGGCCTGCATCTACCTCCTCCACTC     |
| SLC26Dg_I164C_R | GAGGAGGTAGATGCAGGCCAGACCAGCGGCGAC    |
| SLC26Dg_L168C_F | ATCATCTACCTCTGCCCACTCGTGTTCAAAGCT    |
| SLC26Dg_L168C_R | GAACACGAGTGGGCAGAGGTAGATGATGGCCAG    |
| SLC26Dg_V180C_F | CCCAGTGCGCTGTGCGCCATCGTCGTCTCACG     |
| SLC26Dg_V180C_R | GACGACGATGGCGCACAGCGCACTGGGCATAGC    |
| SLC26Dg_V188C_F | GTCCTCACGGTGTGCGCGGTGGTGACCGGCGCG    |
| SLC26Dg_V188C_R | GGTCACCACCGCGCACACCGTGAGGACGACGAT    |
| SLC26Dg_L248C_F | CTGACCGCGCAGTGCATCGACGAACGAACCGAT    |
| SLC26Dg_L248C_R | TCGTTTCGTTCGATGCACTGCGCGGTTCAGCAGACT |
| SLC26Dg_M325C_F | GTGCAGATCCCGTGCAGCGGCGCTGGTGGCCGTG   |
| SLC26Dg_M325C_R | CACCAGCGCCGCGCACGGGATCTGCACCAGCAG    |
| SLC26Dg_S338C_F | GTCGTGGCGATCTGCACCTTTGATTGGGGGAGC    |
| SLC26Dg_S338C_R | CCAATCAAAGGTGCAGATCGCCACGACCATCAT    |
| SLC26Dg_K353C_F | ACGGTCTTCCCCTGCGGGGAGACCGTCGTCATG    |
| SLC26Dg_K353C_R | GACGGTCTCCCCGCACGGGAAGACCGTCAGCGT    |
| SLC26Dg_V367C_F | GTCGCCGTGACGTGCTTCACACATGACCTGAGT    |
| SLC26Dg_V367C_R | GTCATGTGTGAAGCACGTCACGGCGACCGTGGC    |
| SLC26Dg_T369C_F | GCCGTGACGGTGTTCATGCCATGACCTGAGTCTG   |
| SLC26Dg_T369C_R | CAGACTCAGGTCATGGCAGAACACCGTCACGGC    |
| SLC26Dg_H370C_F | GTGACGGTGTTCACATGCGACCTGAGTCTGGGT    |
| SLC26Dg_H370C_R | ACCCAGACTCAGGTTCGCATGTGAACACCGTCAC   |
| SLC26Dg_D371C_F | ACGGTGTTCACACATTGCCCTGAGTCTGGGTGTC   |

|                 |                                    |
|-----------------|------------------------------------|
| SLC26Dg_D371C_R | GACACCCAGACTCAGGCAATGTGTGAACACCGT  |
| SLC26Dg_L372C_F | GTGTTACACATGACTGCAGTCTGGGTGTCTTG   |
| SLC26Dg_L372C_R | CAAGACACCCAGACTGCAGTCATGTGTGAACAC  |
| SLC26Dg_S373C_F | TTCACACATGACCTGTGCCTGGGTGTCTTGATC  |
| SLC26Dg_S373C_R | GATCAAGACACCCAGGCACAGGTCATGTGTGAA  |
| SLC26Dg_L374C_F | CATGACCTGAGTTGCGGTGTCTTGATCGGTGTG  |
| SLC26Dg_L374C_R | GATCAAGACACCGCAACTCAGGTCATGTGTGAA  |
| SLC26Dg_G375C_F | CATGACCTGAGTCTGTGCGTCTTGATCGGTGTG  |
| SLC26Dg_G375C_R | CACACCGATCAAGACGCACAGACTCAGGTCATG  |
| SLC26Dg_V376C_F | GACCTGAGTCTGGGTTGCTTGATCGGTGTGGTG  |
| SLC26Dg_V376C_R | CACCACACCGATCAAGCAACCCAGACTCAGGTC  |
| SLC26Dg_L377C_F | CTGAGTCTGGGTGTCTGCATCGGTGTGGTGCTC  |
| SLC26Dg_L377C_R | GAGCACCACACCGATGCAGACACCCAGACTCAG  |
| SLC26Dg_I378C_F | AGTCTGGGTGTCTTGTGCGGTGTGGTGCTCAGC  |
| SLC26Dg_I378C_R | GCTGAGCACCACACCGCACAAGACACCCAGACT  |
| SLC26Dg_G379C_F | CTGGGTGTCTTGATCTGCGTGGTGCTCAGCGCG  |
| SLC26Dg_G379C_R | CGCGCTGAGCACCACGCAGATCAAGACACCCAG  |
| SLC26Dg_V380C_F | GGTGTCTTGATCGGTTGCGTGCTCAGCGCGTTG  |
| SLC26Dg_V380C_R | CAACGCGCTGAGCACGCAACCGATCAAGACACC  |
| SLC26Dg_V381C_F | GTCTTGATCGGTGTGTGCCCTCAGCGCGTTGTTT |
| SLC26Dg_V381C_R | GAACAACGCGCTGAGGCACACACCGATCAAGAC  |
| SLC26Dg_L382C_F | TTGATCGGTGTGGTGTGCAGCGGTTGTTCTTC   |
| SLC26Dg_L382C_R | GAAGAACAACGCGCTGCACACCACACCGATCAA  |
| SLC26Dg_S383C_F | ATCGGTGTGGTGCTCTGCGGTTGTTCTTCGCT   |
| SLC26Dg_S383C_R | AGCGAAGAACAACGCGCAGAGCACCACACCGAT  |
| SLC26Dg_A384C_F | GGTGTGGTGCTCAGCTGCTTGTTCCTTCGCTCGG |
| SLC26Dg_A384C_R | CCGAGCGAAGAACAAGCAGCTGAGCACCACACC  |
| SLC26Dg_L385C_F | GTGCTCAGCGCGTCTTCTTCGCTCGGAAGGTG   |
| SLC26Dg_L385C_R | CCGAGCGAAGAAGCACGCGCTGAGCACCACACC  |
| SLC26Dg_F386C_F | GTGCTCAGCGCGTTGTGCTTCGCTCGGAAGGTG  |
| SLC26Dg_F386C_R | CACCTTCCGAGCGAAGCACAACGCGCTGAGCAC  |
| SLC26Dg_F387C_F | CTCAGCGGTTGTTCTGCGCTCGGAAGGTGTCG   |
| SLC26Dg_F387C_R | CGACACCTTCCGAGCGCAGAACAACGCGCTGAG  |
| SLC26Dg_A388C_F | AGCGCGTTGTTCTTCTGCCGGAAGGTGTCGCAA  |
| SLC26Dg_A388C_R | TTGCGACACCTTCCGGCAGAAGAACAACGCGCT  |
| SLC26Dg_R389C_F | GCGTTGTTCTTCGCTTGCAAGGTGTGCGCAACTC |
| SLC26Dg_R389C_R | GAGTTGCGACACCTTGCAAGCGAAGAACAACGC  |
| SLC26Dg_K390C_F | TTGTTCTTCGCTCGGTGCGTGTGCGCAACTCTCG |
| SLC26Dg_K390C_R | CGAGAGTTGCGACACGCACCGAGCGAAGAACAA  |

|                 |                                    |
|-----------------|------------------------------------|
| SLC26Dg_V391C_F | TTCTTCGCTCGGAAGTGCTCGCAACTCTCGCAG  |
| SLC26Dg_V391C_R | CTGCGAGAGTTGCGAGCACTTCCGAGCGAAGAA  |
| SLC26Dg_S392C_F | GCTCGGAAGGTGTGCCAACTCTCGCAGGTGACG  |
| SLC26Dg_S392C_R | CTGCGAGAGTTGGCACACCTTCCGAGCGAAGAA  |
| SLC26Dg_Q393C_F | GCTCGGAAGGTGTCTGTCGCTCTCGCAGGTGACG |
| SLC26Dg_Q393C_R | CGTCACCTGCGAGAGGCACGACACCTTCCGAGC  |
| SLC26Dg_L394C_F | CGGAAGGTGTGCGCAATGCTCGCAGGTGACGCCG |
| SLC26Dg_L394C_R | CGGCGTCACCTGCGAGCATTGCGACACCTTCCG  |
| SLC26Dg_S395C_F | AAGGTGTGCGCAACTCTGCCAGGTGACGCCGGTG |
| SLC26Dg_S395C_R | CACCGGCGTCACCTGGCAGAGTTGCGACACCTT  |
| SLC26Si_C567S_F | CATGAAGCTGTTAGCGCCTTAGCTAAGCAGCAC  |
| SLC26Si_C567S_R | CTTAGCTAAGGCGCTAACAGCTTCATGCTGGCT  |
| SLC26Si_I413C_F | ATCCTGCTCACGCTGTGCTTCGGCGTTGAAGCG  |
| SLC26Si_I413C_R | CGTTCAACGCCGAAGCACAGCGTGAGCAGGAT   |
| SLC26Si_F414C_F | CTGCTCACGCTGATTTGCGGCGTTGAAGCGGGG  |
| SLC26Si_F414C_R | CCCCGCTTCAACGCCGCAAATCAGCGTGAGCAG  |
| SLC26Si_G415C_F | CTCACGCTGATTTTCTGCGTTGAAGCGGGGGTG  |
| SLC26Si_G415C_R | CACCCCCGCTTCAACGCAGAAAATCAGCGTGAG  |
| SLC26Si_V416C_F | ACGCTGATTTTCGGCTGCGAAGCGGGGGTGAGC  |
| SLC26Si_V416C_R | GCTCACCCCCGCTTCGCAGCCGAAAATCAGCGT  |
| SLC26Si_E417C_F | CTGATTTTCGGCGTTTTCGCGGGGGTGAGCGCG  |
| SLC26Si_E417C_R | CGCGCTCACCCCCGCGCAAACGCCGAAAATCAG  |
| SLC26Si_A418C_F | ATTTTCGGCGTTGAATGCGGGGTGAGCGCGGGG  |
| SLC26Si_A418C_R | CCCCGCGCTCACCCCCGATTC AACGCCGAAAAT |
| SLC26Si_G419C_F | TTCGGCGTTGAAGCGTGCGTGAGCGCGGGGGT   |
| SLC26Si_G419C_R | GACCCCCGCGCTCACGCACGCTTCAACGCCGAA  |
| SLC26Si_S421C_F | GTTGAAGCGGGGGTGTGCGCGGGGGTTCATCACC |
| SLC26Si_S421C_R | GGTGATGACCCCCGCGCACACCCCCGCTTCAAC  |
| SLC26Si_G423C_F | GCGGGGGTGAGCGCGTGCGTCATCACCTCGATC  |
| SLC26Si_G423C_R | GATCGAGGTGATGACGCACGCGCTCACCCCCGC  |
| SLC26Si_S427C_F | GCGGGGGTTCATCACCTGCATCCTGGTCCATCTT |
| SLC26Si_S427C_R | AAGATGGACCAGGATGCAGGTGATGACCCCCGC  |
| SLC26Si_L429C_F | GTCATCACCTCGATCTGCGTCCATCTTTATAAG  |
| SLC26Si_L429C_R | CTTATAAAGATGGACGCAGATCGAGGTGATGAC  |
| SLC26Si_V430C_F | ATCACCTCGATCCTGTGCCATCTTTATAAGACC  |
| SLC26Si_V430C_R | GGTCTTATAAAGATGGCACAGGATCGAGGTGAT  |
| SLC26Si_H431C_F | ACCTCGATCCTGGTCTGCCCTTTATAAGACCTCG |
| SLC26Si_H431C_R | CGAGGTCTTATAAAGGCAGACCAGGATCGAGGT  |
| SLC26Si_L432C_F | TCGATCCTGGTCCATTGCTATAAGACCTCGCGC  |

|                    |                                              |
|--------------------|----------------------------------------------|
| SLC26Si_L432C_R    | GCGCGAGGTCTTATAGCAATGGACCAGGATCGA            |
| SLC26Si_Y433C_F    | ATCCTGGTCCATCTTTGCAAGACCTCGCGCCCG            |
| SLC26Si_Y433C_R    | CGGGCGCGAGGTCTTGCAAAGATGGACCAGGAT            |
| SLC26Si_K434C_F    | CTGGTCCATCTTTATTGCACCTCGCGCCCGCAT            |
| SLC26Si_K434C_R    | ATGCGGGCGCGAGGTGCAATAAAGATGGACCAG            |
| SLC26Si_T435C_F    | GTCCATCTTTATAAGTGCTCGCGCCCGCATATG            |
| SLC26Si_T435C_R    | CATATGCGGGCGCGAGCACTTATAAAGATGGAC            |
| SLC26Si_S436C_F    | CATCTTTATAAGACCTGCCGCCCGCATATGGCT            |
| SLC26Si_S436C_R    | AGCCATATGCGGGCGGCAGGTCTTATAAAGATG            |
| SLC26Si_R437C_F    | CTTTATAAGACCTCGTGCCCGCATATGGCTGTG            |
| SLC26Si_R437C_R    | CACAGCCATATGCGGGCACGAGGTCTTATAAAG            |
| SLC26Si_P438C_F    | TATAAGACCTCGCGCTGCCATATGGCTGTGGTG            |
| SLC26Si_P438C_R    | CACCACAGCCATATGGCAGCGCGAGGTCTTATA            |
| SLC26Si_H439C_F    | AAGACCTCGCGCCCGTGCATGGCTGTGGTGGGC            |
| SLC26Si_H439C_R    | GCCCACCACAGCCATGCACGGGCGCGAGGTCTT            |
| ratprestin_F       | ATATATGCTCTTCTAGTCTGCTGTGATCATTGCTCTGCTCACTG |
| ratprestin_R       | TATATAGCTCTTCATGCGTGGCGACCGGTGGATCCCGGGCCCGC |
| ratprestin_V499C_F | GCTCTGCTCACTTGCATTTACAGAACACAGAGT            |
| ratprestin_V499C_R | TGTTCTGTAAATGCAAGTGAGCAGAGCAATGAT            |
| ratprestin_I500C_F | CTGCTCACTGTGTGCTACAGAACACAGAGTCCG            |
| ratprestin_I500C_R | CTGTGTTCTGTAGCACACAGTGAGCAGAGCAAT            |

All primers are depicted in 5' to 3' direction. Forward and reverse primers are indicated by "F" and "R", respectively.
