# Supplementary material for: Structural basis for functional interactions in dimers of SLC26 transporters
Source: Nat Commun. 2019 May 2;10:2032. doi: 10.1038/s41467-019-10001-w (PMC6497670; doi:10.1038/s41467-019-10001-w)
Supplement: Supplementary file 6 — Source Data [file 41467_2019_10001_MOESM6_ESM.xlsx]

## Sheet: Figure 4a
In gel GFP fluorescence
whitefield (prestained marker)

## Sheet: Figure 5b
Coomassie stain

## Sheet: Figure 5c
	nmole fumarate/mg protein
wt100	1	2	3	avg	std
0	-0.195699	0.0390342	0.156664	0	0.179395
10	5.58061	5.15035	5.40504	5.37867	0.216337
20	8.0885	8.88018	8.65093	8.53987	0.407357
	nmole fumarate/mg protein
WT50IL50	1	2	3	avg	std
0	0.107906	0.0448422	-0.152748	0	0.13599
10	4.18237	4.16416	4.53318	4.29324	0.207999
20	7.29933	7.57907	7.56132	7.4799	0.156638
	nmole fumarate/mg protein
IL100	1	2	3	avg	std
0	0.0775832	0.0342044	-0.111788	0	0.0992107
10	0.888995	1.1068	1.41844	1.13808	0.266105
20	1.35345	1.69049	1.63139	1.55844	0.179971
	nmole fumarate/mg protein
WT100_10DTT	1	2	3	avg	std
0	-0.0828099	-0.0238103	0.10662	0	0.0969337
10	5.14074	5.40327	5.41605	5.32002	0.155395
20	7.96358	8.09717	7.96113	8.00729	0.0778449
	nmole fumarate/mg protein
WT50IL50_10DTT	1	2	3	avg	std
0	-0.0586273	-0.0766768	0.135304	0	0.117524
10	4.88606	4.76846	5.33123	4.99525	0.296854
20	7.88953	8.21296	8.55812	8.2202	0.334353
	nmole fumarate/mg protein
IL100_10DTT	1	2	3	avg	std
0	-0.0367293	-0.0244948	0.061224	-6.245e-17	0.0533733
10	6.07516	6.5982	5.86713	6.18016	0.376681
20	10.5238	10.3409	10.2688	10.3778	0.131462

## Sheet: Figure 5d
	nmole fumarate/(mg protein*min)
wt100	1	2	3	avg	std
10	5.58061	5.15035	5.40504	5.37867	0.216337		per 10 sec
60	33.4837	30.9021	32.4302	32.272	1.29802		per minute
	nmole fumarate/(mg protein*min)
WT75IL25	1	2	3	avg	std
10	4.94957	5.34864	4.97421	5.09081	0.22363		per 10 sec
60	29.6974	32.0918	29.8453	30.5448	1.34178		per minute
	nmole fumarate/(mg protein*min)
WT50IL50	1	2	3	avg	std
10	4.18237	4.16416	4.53318	4.29324	0.207999		per 10 sec
60	25.0942	24.985	27.1991	25.7594	1.248		per minute
	nmole fumarate/(mg protein*min)
WT25IL75	1	2	3	avg	std
10	3.50579	3.31257	3.23525	3.3512	0.139348		per 10 sec
60	21.0347	19.8754	19.4115	20.1072	0.836085		per minute
	nmole fumarate/(mg protein*min)
IL100	1	2	3	avg	std
10	0.888995	1.1068	1.41844	1.13808	0.266105		per 10 sec
60	5.33397	6.64081	8.51064	6.82847	1.59663		per minute

## Sheet: Suppl. Fig. 2c
	nmole fumarate/mg transporter
	cysless
	time	1st	2nd	3rd	avg	std
	0	0.869379	0.817037	0.94294	0.876452	0.0632489
	30	22.236	23.47	22.8449	22.8503	0.617017
	60	34.0185	34.4429	33.9323	34.1312	0.273335
	120	47.7589	44.6751	45.5621	45.9987	1.58757
	129
	time	1st	2nd	3rd	avg	std
	0	2.49749	2.70017	2.66499	2.62088	0.108302
	30	22.6397	22.4367	23.5215	22.866	0.576699
	60	37.1741	34.7206	36.6017	36.1654	1.28361
	120	57.585	58.2487	57.4651	57.7663	0.422094
	144
	time	1st	2nd	3rd	avg	std
	0	5.37273	5.19973	5.42259	5.33168	0.116966
	30	45.8587	41.0225	45.0958	43.9924	2.60011
	60	75.9379	75.4315	73.8226	75.064	1.10451
	120	119.757	115.41	115.17	116.779	2.5816
	353
	time	1st	2nd	3rd	avg	std
	0	2.45936	2.29592	2.36394	2.37307	0.0820996
	30	23.3533	22.0474	22.4546	22.6184	0.668175
	60	36.7679	36.2826	36.5258	36.5255	0.24265
	120	60.1503	58.7512	57.2139	58.7051	1.46873
	367
	time	1st	2nd	3rd	avg	std
	0	1.3735	1.47413	1.48182	1.44315	0.0604414
	30	18.2177	17.7302	17.7492	17.899	0.276172
	60	29.1608	27.6376	28.1994	28.3326	0.770294
	120	41.5421	40.3379	39.5073	40.4624	1.0231
	385
	time	1st	2nd	3rd	avg	std
	0	1.17572	1.06006	1.31135	1.18238	0.125778
	30	8.44679	8.38382	8.43043	8.42034	0.0326747
	60	12.1155	12.2261	12.1727	12.1714	0.0553102
	120	16.3303	17.028	16.3575	16.5719	0.395199
	empty
	time	1st	2nd	3rd	avg	std
	0	0.0410745	0.0432073	0.0425675	0.0422831	0.00109445
	30	0.0852004	0.0774596	0.0823715	0.0816772	0.00391681
	60	0.0816278	0.0888069	0.0841232	0.0848526	0.0036447
	120	0.102302	0.0937834	0.0937218	0.0966024	0.00493615
